# Supplementary material for: A luminescent metal–organic framework for sensing methanol in ethanol solution
Source: Royal Society of Chemistry journal article supplement (doi:10.1039/c3dt51414e), 2013-01-01
Supplement: c3dt51414e.pdf [file c3dt51414e.pdf]

## Supporting Information for

### A Luminescent Metal-Organic Framework for Sensing Methanol in Ethanol Solution

Zhao Jin,<sup>a</sup> Hongming He,<sup>b</sup> Huanyu Zhao,<sup>a</sup> Tsolmon, Borjigin,<sup>b</sup> Fuxing Sun,<sup>b</sup> and  
Guangshan Zhu<sup>\*ab</sup>

*a* Queensland Micro- and Nanotechnology Centre, Griffith University, Nathan QLD  
4111 Australia, g.zhu@griffith.edu.au

*b* State Key Laboratory of Inorganic Synthesis & Preparative Chemistry, Jilin  
University, Changchun 130012 (China) Fax: (+86) 431-8516-8331

\*To whom correspondence should be addressed, E-mail: g.zhu@griffith.edu.au

**General Methods:** All the chemicals and solvents used without further purification. Powder X-ray diffraction (XRD) data were collected on Scintag X1 diffractometer with Cu-K $\alpha$  ( $\lambda = 1.5418\text{\AA}$ ) at 40kV, 35mA. A Perkin-Elmer TGA 7 thermogravimetric analyzer was used to obtain thermogravimetric analysis (TGA) curve in air with a heating rate of 5°C/min. Luminescence spectra were measured using a HITACHI F-7000 fluorescence spectrometer.

**Luminescence Measurements:** The luminescence properties of **1** were investigated in the solid state and in various solvent emulsions at room temperature. The **1**–solvent emulsions were prepared by introducing 60 mg of **1** powder into 1.00 mL of methanol, ethanol and water. For sensing properties tests, the standard emulsion was prepared by introducing 120 mg of **1** powder into 0.5 mL ethanol. Different amounts of methanol were added into the standard **1** emulsion in ethanol. The photomultiplier tube voltage was 700 V, the scan speed was 1200 nm min<sup>-1</sup>, and the slit widths were 5.0 nm.

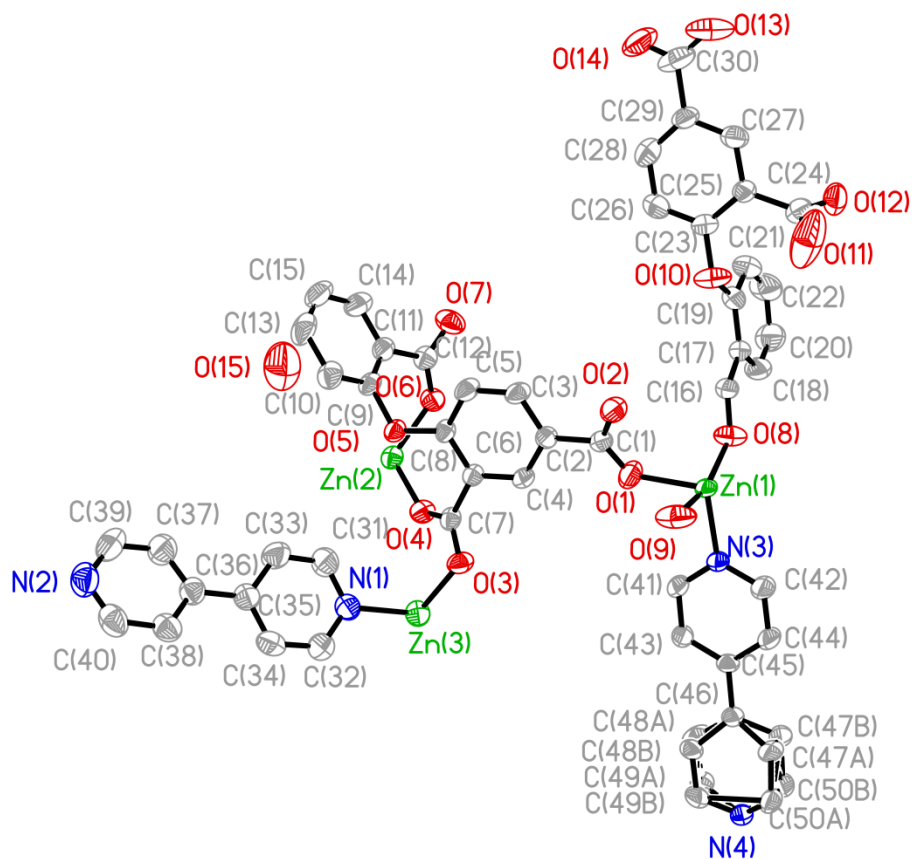

Fig. S1 The asymmetric unit of complex **1** is comprised of three crystallographically independent Zn(II) atoms, two fully deprotonated cpiop<sup>3-</sup> ligands, two 4,4'-bpy ligands and one guest H<sub>2</sub>O molecular.

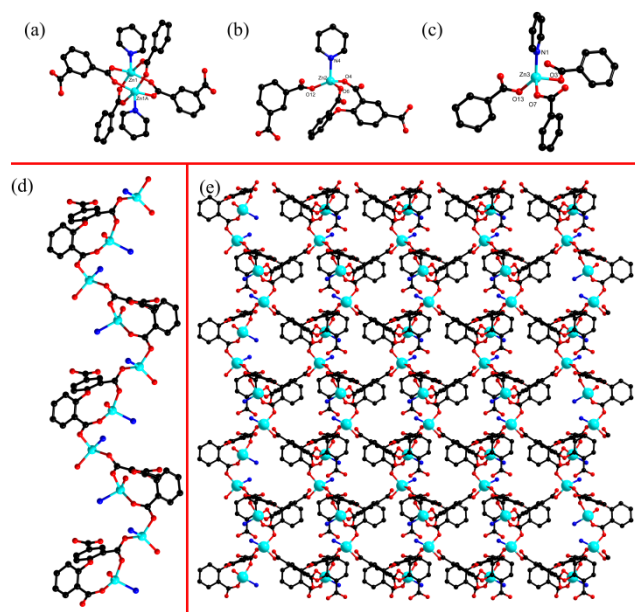

Fig. S2 Coordination environment of Zn1 (a); Zn2 (b); Zn3 (c); (d) 1D zig-zag chain consisted with Zn2, Zn3 and L1 along b-axis; (e) 2D layer formed by 1D zig-zag chains interconnecting with each other via L2. Zn: cyan, C: black, O: red, N: blue. H atoms omitted for clarity.

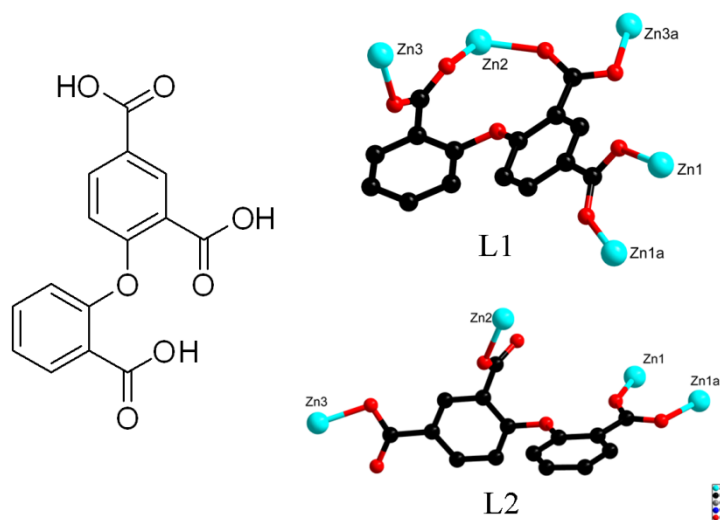

Fig. S3 ChemDraw-style picture of the ligand; (left) Coordination modes of cpoip<sup>3-</sup> ligand. (right)

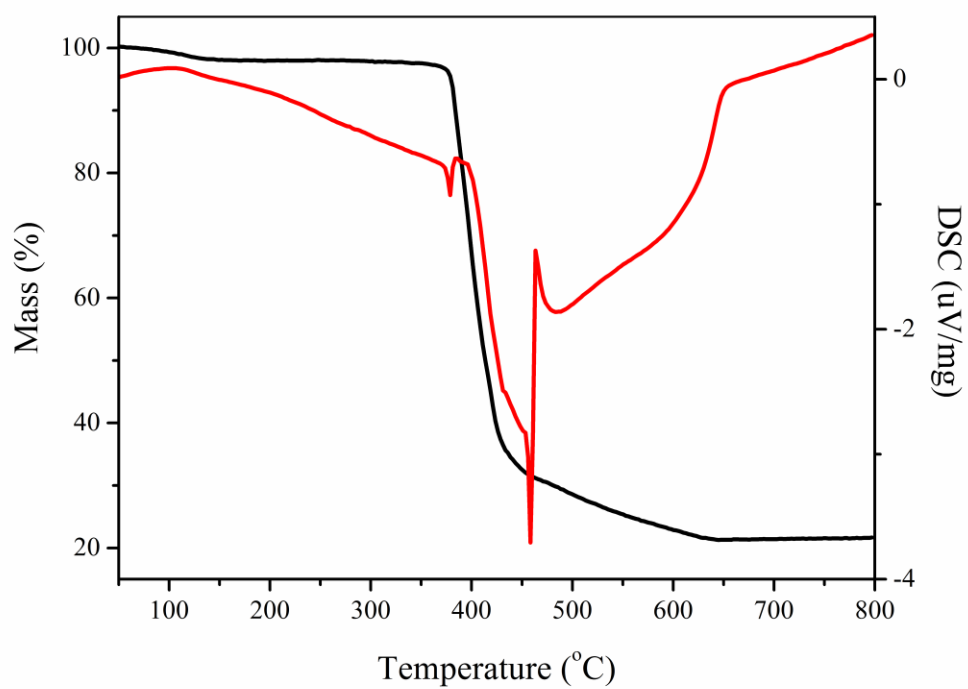

Fig S4 TGA and DSC measurements for as-synthesized **1**.

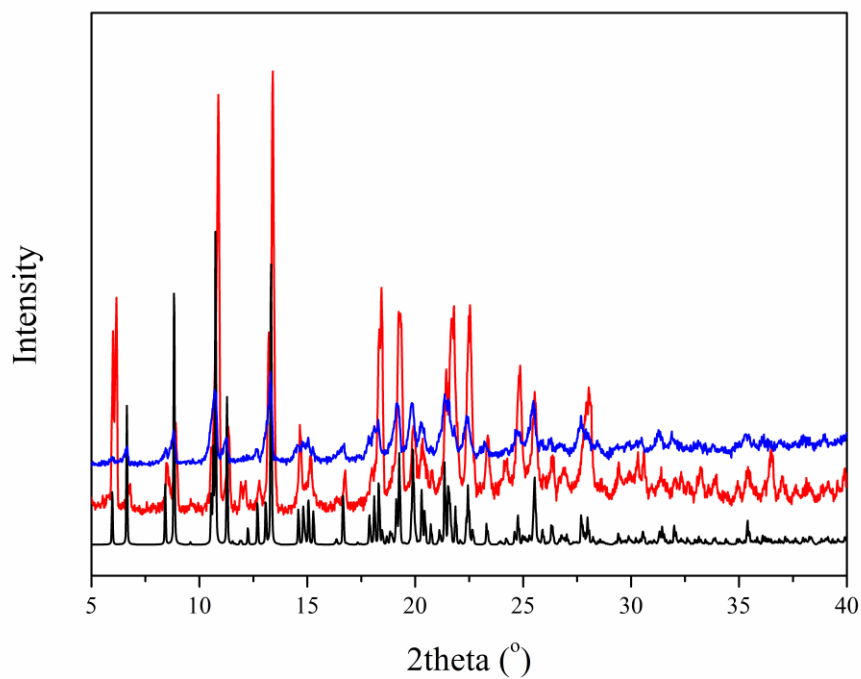

Fig S5 PXRD of the compound **1**. After sensing tests (blue, upper); As-synthesis (red, middle); Simulated (black, below)

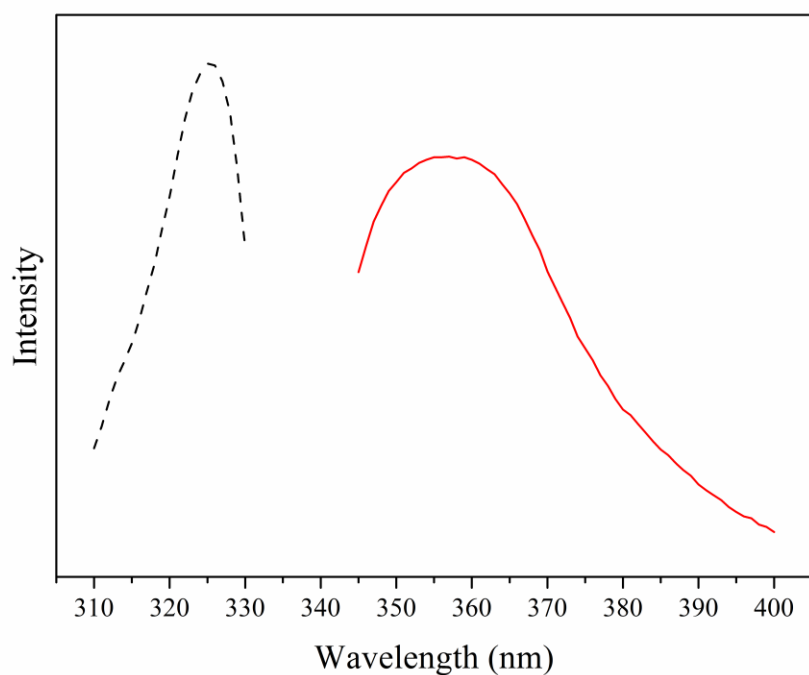

Fig S6 Emission spectrum of the H<sub>3</sub>cpoip ligand in solid state exhibits a broad peak centered at 357 nm when excited at 325 nm.

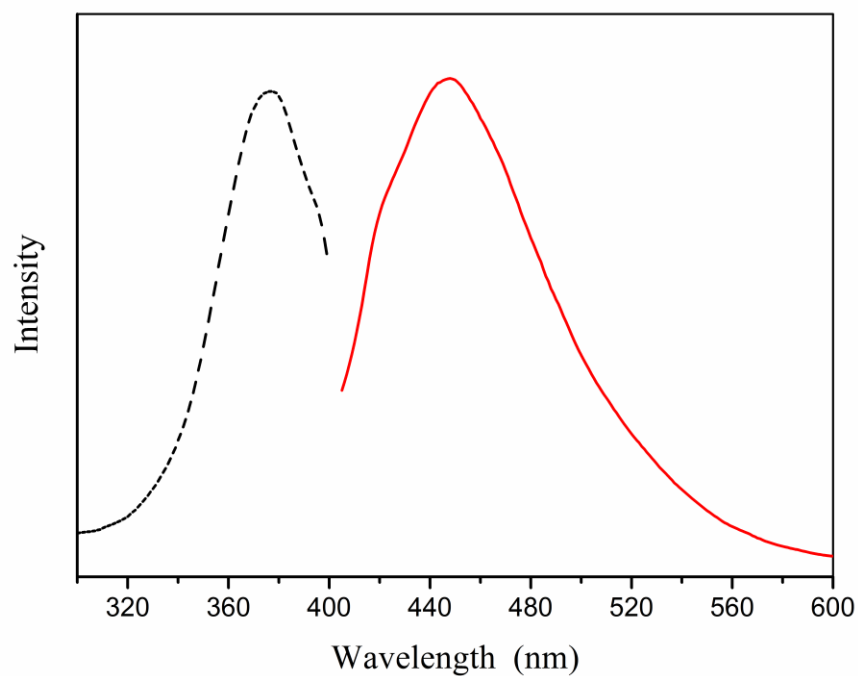

Fig S7 Emission spectrum of **1** in solid state.

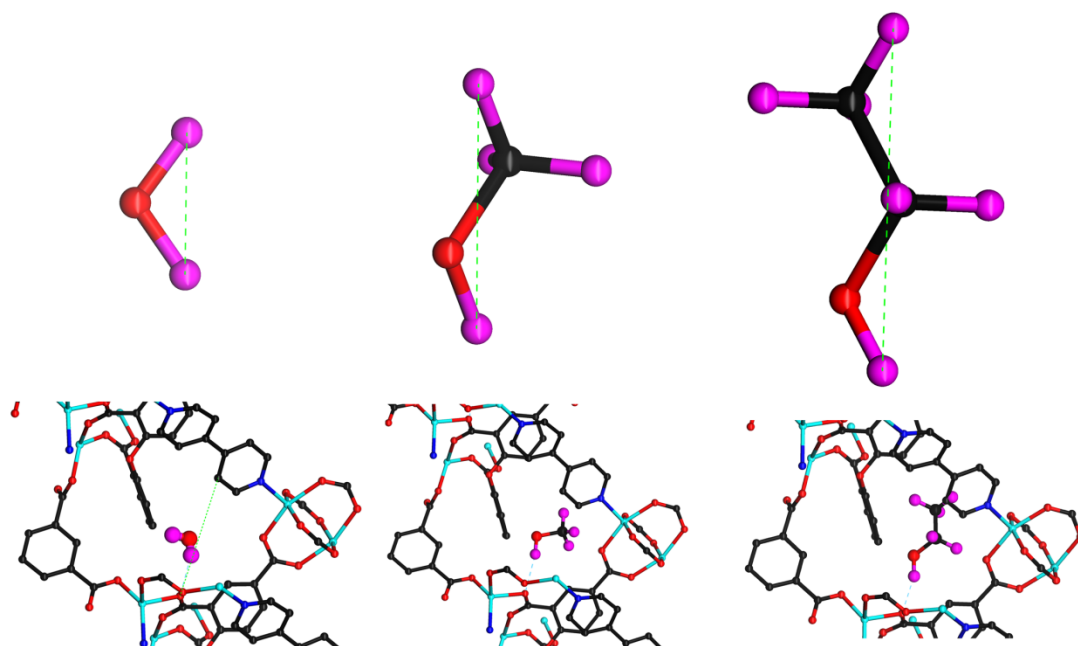

Fig S8 water, methanol and ethanol molecules, their size are defined by the two H atoms with the largest distance. (upper) Simulation for comparison of pore size and the size of these molecules in MS (below), indicates that methanol molecular can go through the channel and exchange the guest water molecular. In contrast, ethanol molecular is too big to get into the channel to exchange the guest water molecular. So, the emission of **1** in water and ethanol are the same, but the emission of **1** in methanol displays obvious change.

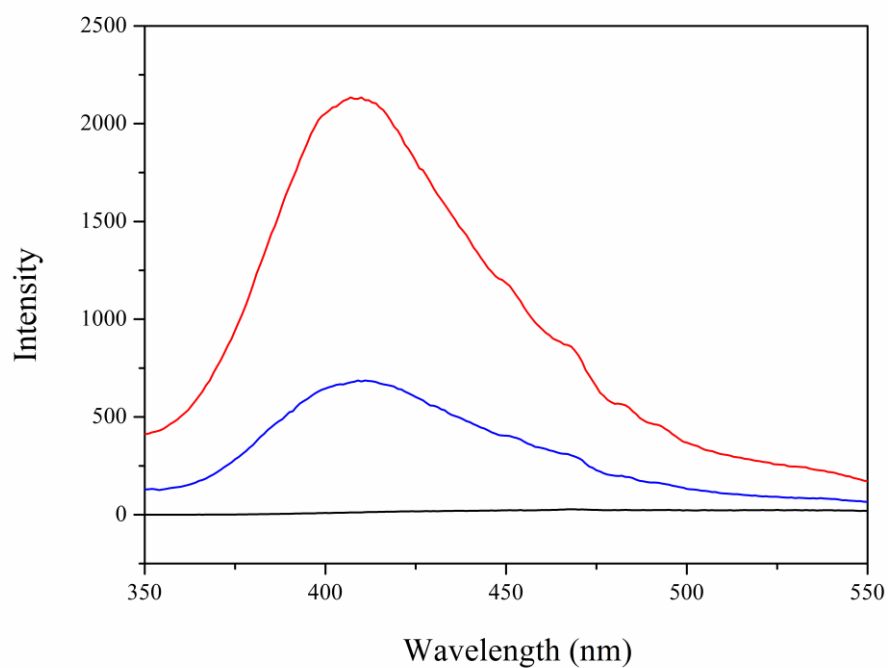

Fig S9 Emissive response spectra of 1 for methanol in H<sub>2</sub>O solution with different methanol volume concentration. (v/v;  $2 \times 10^{-7}$ , black and below;  $1 \times 10^{-4}$ , blue and middle;  $1 \times 10^{-1}$ , red and upper)

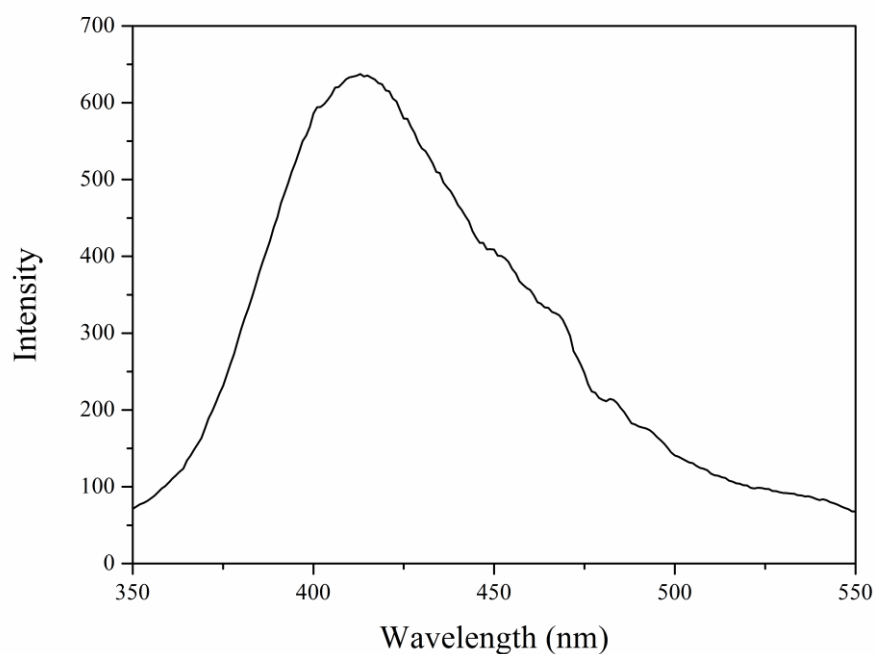

Fig S9 Emissive response spectra of **1** for methanol in imitated alcoholic beverage. Methanol concentration here is  $1 \times 10^{-4}$  according to the results obtained from emissive response spectra of **1** in methanol/ethanol binary system.

Table. S1 Crystallographic Data for compounds **1**

| Compound                                                         | 1                                                                              |
|------------------------------------------------------------------|--------------------------------------------------------------------------------|
| Chemical formula                                                 | Zn <sub>3</sub> C <sub>50</sub> H <sub>28</sub> N <sub>4</sub> O <sub>15</sub> |
| Formula weight                                                   | 1120.87                                                                        |
| Crystal system                                                   | Monoclinic                                                                     |
| Space group                                                      | P21/c                                                                          |
| <i>a</i> (Å)                                                     | 10.235(2)                                                                      |
| <i>b</i> (Å)                                                     | 14.898(3)                                                                      |
| <i>c</i> (Å)                                                     | 30.275(6)                                                                      |
| $\alpha$ (°)                                                     | 90                                                                             |
| $\beta$ (°)                                                      | 101.897(6)                                                                     |
| $\gamma$ (°)                                                     | 90                                                                             |
| <i>V</i> (Å <sup>3</sup> )                                       | 4517.2(16)                                                                     |
| <i>Z</i>                                                         | 4                                                                              |
| <i>D<sub>c</sub></i> /g cm <sup>-3</sup>                         | 1.648                                                                          |
| reflections collected / unique                                   | 28285 / 10948                                                                  |
| Completeness to theta = 25.00                                    | 96.3 %                                                                         |
| <sup>a</sup> <i>R</i> <sub>1</sub> [ <i>I</i> > 2σ( <i>I</i> )]  | 0.0564                                                                         |
| <sup>b</sup> <i>wR</i> <sub>2</sub> [ <i>I</i> > 2σ( <i>I</i> )] | 0.1398                                                                         |
| <i>Goof</i> on F <sup>2</sup>                                    | 1.027                                                                          |

Table. S2 Selected Bond lengths [ $\text{\AA}$ ] and angles [ $^\circ$ ] for compound 1

|                    |            |                      |            |
|--------------------|------------|----------------------|------------|
| Zn(1)-O(8)         | 2.015(2)   | Zn(2)-O(6)           | 1.9377(18) |
| Zn(1)-O(9)         | 2.024(2)   | Zn(2)-O(4)           | 1.9775(19) |
| Zn(1)-N(3)         | 2.0385(19) | Zn(2)-N(4)#3         | 2.043(2)   |
| Zn(1)-O(2)#1       | 2.0426(19) | Zn(3)-O(13)#4        | 1.955(2)   |
| Zn(1)-O(1)         | 2.048(2)   | Zn(3)-O(7)#5         | 1.976(2)   |
| Zn(1)-Zn(1)#1      | 2.9332(7)  | Zn(3)-O(3)           | 2.0245(18) |
| Zn(2)-O(12)#2      | 1.921(2)   | Zn(3)-N(1)           | 2.027(2)   |
| O(8)-Zn(1)-O(9)    | 158.25(8)  | O(12)#2-Zn(2)-O(4)   | 101.20(9)  |
| O(8)-Zn(1)-N(3)    | 109.33(8)  | O(6)-Zn(2)-O(4)      | 109.39(8)  |
| O(9)-Zn(1)-N(3)    | 92.38(8)   | O(12)#2-Zn(2)-N(4)#3 | 113.91(9)  |
| O(8)-Zn(1)-O(2)#1  | 88.64(9)   | O(6)-Zn(2)-N(4)#3    | 104.27(8)  |
| O(9)-Zn(1)-O(2)#1  | 86.55(10)  | O(4)-Zn(2)-N(4)#3    | 95.53(8)   |
| N(3)-Zn(1)-O(2)#1  | 99.14(8)   | O(13)#4-Zn(3)-O(7)#5 | 96.94(10)  |
| O(8)-Zn(1)-O(1)    | 89.03(9)   | O(13)#4-Zn(3)-O(3)   | 104.29(10) |
| O(9)-Zn(1)-O(1)    | 88.21(10)  | O(7)#5-Zn(3)-O(3)    | 103.41(8)  |
| N(3)-Zn(1)-O(1)    | 100.61(8)  | O(13)#4-Zn(3)-N(1)   | 136.42(11) |
| O(2)#1-Zn(1)-O(1)  | 159.75(7)  | O(7)#5-Zn(3)-N(1)    | 107.79(10) |
| O(12)#2-Zn(2)-O(6) | 127.75(8)  | O(3)-Zn(3)-N(1)      | 104.07(8)  |

Symmetry mode for 1: #1 -x,-y+1,-z+2; #2 x,-y+1/2,z-1/2; #3 -x-1,y-1/2,-z+3/2;  
#4 x-1,-y+1/2,z-1/2; #5 -x,y+1/2,-z+3/2; #6 x+1,-y+1/2,z+1/2; #7 -x-1,y+1/2,-z+3/2;  
#8 -x,y-1/2,-z+3/2; #9 x,-y+1/2,z+1/2;
